# Quantifying Parallel Evolution

William R. Shoemaker<sup>1,\*</sup> and Jay T. Lennon<sup>1</sup>

<sup>1</sup>Department of Biology, Indiana University, Bloomington, IN,  
47405, USA

\*Correspondence to: wrshoema@indiana.edu

May 13, 2020

## Abstract

Parallel evolution is consistently observed across the tree of life. However, the degree of parallelism between replicate populations in evolution experiments is rarely quantified at the gene level. Here we examine parallel evolution as the degree of covariance between replicate populations, providing a justification for the use of dimensionality reduction. We examine the extent that signals of gene-level covariance can be inferred in microbial evolve-and-resequence evolution experiments, finding that deviations from parallelism are difficult to quantify at a given point in time. However, this low statistical signal means that covariance between replicate populations is unlikely to interfere with the ability to detect divergent evolutionary trajectories for populations in different environments. Finally, we find evidence suggesting that temporal patterns of parallelism are comparatively easier to detect and that these patterns may reflect the evolutionary dynamics of microbial populations.

**Keywords**— Experimental evolution, Microbial evolution, Parallel evolution

## 23 1 Introduction

24 Parallel evolution occurs when independent populations evolve similar phenotypes  
25 and genotypes. Observed across the tree of life [12, 41, 27], parallel evolution has  
26 historically been viewed as a singular outcome that is representative of adaptation  
27 [24]. However, parallelism is not binary [8, 47, 32]. Instead, parallelism is a continuous  
28 quantity that captures the variation in evolutionary outcomes, allowing for researchers  
29 to test hypotheses about the extent that evolutionary and ecological forces affect the  
30 repeatability of evolutionary outcomes relative to a null expectation.

31 The idea that parallelism should be viewed as a quantity is particularly suited  
32 to the experimental study of microbial evolution, where many large populations with  
33 short generation times can be simultaneously maintained. In microbial systems the  
34 same evolutionary outcome can repeatedly occur across levels of biological organiza-  
35 tion, ranging from nucleotide sites repeatedly acquiring the same mutation [7] to phe-  
36 notypes consistently changing in the same direction and magnitude [17] to predator-  
37 prey systems repeatedly evolving similar dynamics [18]. The experimental tractability  
38 of many microbial systems also allows for the degree of parallelism to be examined  
39 across diverse ecological scenarios. For example, it has been argued that an excep-  
40 tional degree of parallel outcomes has been observed in evolution experiments where  
41 microbial populations adapt to high temperatures [50], alternative resources [21], and  
42 the introduction of new species [45]. The power of experimental microbial evolution  
43 provides unique opportunities for the degree of variation in evolutionary outcomes to  
44 be examined across biological hierarchies and environments.

45 Parallel evolution can be found across biological scales, though it is not equally  
46 likely at each scale. Independently evolving bacterial populations are unlikely to ac-  
47 quire mutations at the same nucleotide site in most evolve-and-resequence experiments  
48 [13], making it necessary to group mutations together. Under this coarse-graining, ge-  
49 netic parallelism is examined as the set of genes that acquire more mutations than  
50 expected by chance. A number of statistical approaches have been developed and  
51 applied to evolution experiments to identify this set of genes [55, 6, 49, 23, 3]. In

52 addition, in recent years increases attention has been given to the shape of this distri-  
53 bution of mutations across genes, with a particular focus on developing a reasonable  
54 statistical null for parallelism [23] and identifying evolutionary mechanisms that drive  
55 the shape of the distribution [4].

56 While the distribution of mutations among genes has been given considerable at-  
57 tention, relatively few attempts have been made to examine the joint distribution of  
58 mutation counts between genes [15]. Epistatic interactions between mutations in dif-  
59 ferent genes make certain combinations of mutation counts more likely than others,  
60 generating covariance between populations [5] (analogous to within/between popula-  
61 tion genetic variation [20] or  $\alpha/\beta$  species diversity [56]). Conceptually, this covariance  
62 can be understood as the inverse of parallel evolution, where higher levels of covari-  
63 ance between genes makes replicate populations less genetically similar. Because more  
64 genes acquire mutations than there are replicate populations for the vast majority  
65 of evolution experiments, dimensionality reduction is often necessary to determine  
66 whether covariance exists. Dimensionality reduction approaches have been applied  
67 to determine whether replicate populations in different environments diverged at the  
68 gene level [52], though these approaches have yet to be used to quantify the degree of  
69 parallelism among replicate populations .

70 Here, we examine how covariance between genes relates to the experimental evolu-  
71 tion of microbial populations. We investigate how a stochastic formulation of Principal  
72 Component Analysis [44] relates to covariance between genes and how that covariance  
73 can be accounted for to determine whether the outcome of an evolution experiment  
74 was more or less parallel than expected by chance. We argue that in the context of  
75 experimental evolution the concept of parallelism should be treated as a continuous  
76 quantity where the absence of covariance between genes represents a statistical null  
77 to be rejected. We compare mathematical approaches from statistical physics and  
78 multivariate statistics using simulations to quantify the degree of parallelism and its  
79 significance. We then examine whether deviations from parallelism interfere with the  
80 ability to detect divergent evolution in case studies where replicate populations evolved  
81 under different conditions. Finally, we examine how parallelism varies over time in a

82 highly temporally resolved evolution experiment.

## 83 2 Materials and Methods

### 84 2.1 Parallel evolution and PCA

85 We examine the relationship between conceptualizations of parallel evolution and  
86 PCA. We assume that  $n$  replicate populations have been propagated for an equal  
87 number of generations in the same environment. Assuming that the populations are  
88 evolving under the strong selection, weak mutation limit (SSWM), the molecular dy-  
89 namics can be examined as a biased random walk on genotypic space consisting of  $L$   
90 biallelic sites that comprises the set of epistatic interactions between sites. Once pop-  
91 ulations have been sequenced, a site-by-population matrix can be constructed, where  
92 each value represents the presence or absence of a given mutation in a given popu-  
93 lation. While there is evidence that parallel outcomes can occur at the nucleotide  
94 level in microbial evolution experiments [23], it is far more common in organisms with  
95 smaller genomes and larger population sizes such as viruses [7]. Instead, to examine  
96 parallelism, it is reasonable to reduce sparsity by constructing an  $G \times n$  population-by-  
97 gene count matrix  $\mathbf{Z}$ , effectively coarse-graining genotypic space into  $G$  genes. At this  
98 point the question of whether or not parallelism is present in an evolution experiment  
99 can be understood as the degree that epistatic interactions between sites translates to  
100 an observable statistical signal at the gene-level.

101 To understand how  $\mathbf{Z}$  relates to the concept of parallelism is it useful to use PCA  
102 as a conceptual intermediate. If elements of  $\mathbf{Z}$  have been centered by the mean of each  
103 column as  $X_{i,j} = Z_{i,j} - \frac{1}{n} \sum_{k=1}^n Z_{i,k}$  to create the zero-centered matrix  $\mathbf{X}$ , then the  
104 empirical population covariance matrix can be estimated as

$$\mathbf{C} = \frac{1}{n-1} \mathbf{X}\mathbf{X}^T \quad (1)$$

105 The principal components of  $\mathbf{X}$  are obtained from the eigenvectors of  $\mathbf{C}$ . However,  
106 PCA is closely connected to the factorization process of Singular Value Decomposition

107 (SVD) [44], which has been previously used to establish intuitive connections between  
 108 evolutionary processes and PCA [34]. Following this approach, the SVD is performed  
 109 using the stochastic matrix  $\mathbf{M}$ :

$$\mathbf{M} = \frac{1}{G} \mathbf{X}^T \mathbf{X} \quad (2)$$

As  $\mathbf{M}$  is a stochastic matrix, the expected value for each element can be examined as:

$$\mathbb{E}[M_{i,j}] = \frac{1}{G} \sum_{g=1}^G \mathbb{E}[X_{g,i} X_{g,j}] \quad (3a)$$

$$= \frac{1}{G} \sum_g \mathbb{E} \left[ \left( Z_{g,i} - \frac{1}{n} \sum_{k=1}^n Z_{g,k} \right) \left( Z_{g,j} - \frac{1}{n} \sum_{k=1}^n Z_{g,k} \right) \right] \quad (3b)$$

110 By expanding the brackets, the expected value of  $M_{i,j}$  for a single gene  $g$  is

$$\mathbb{E}[M_{i,j}^{(g)}] = \mathbb{E}[Z_{g,i} Z_{g,j}] - \frac{1}{n} \sum_{k=1}^n \mathbb{E}[Z_{g,i} Z_{g,k}] - \frac{1}{n} \sum_{k=1}^n \mathbb{E}[Z_{g,j} Z_{g,k}] + \sum_{k=1}^n \sum_{l=1}^n \mathbb{E}[Z_{g,k} Z_{g,l}] \quad (4)$$

111 Each element of eqn. 4 contains at least one expected value of two joint ran-  
 112 dom variables, which can be viewed as the sum of the products of the expected value  
 113 of each random variable and their covariance (ex.,  $\mathbb{E}[Z_{g,i} Z_{g,j}] = \mathbb{E}[Z_{g,i}] \mathbb{E}[Z_{g,j}] +$   
 114  $\text{cov}(Z_{g,i}, Z_{g,j})$ ). Assuming that no cross-contamination occurred over the course of the  
 115 experiment, our populations are evolutionarily independent and we can set  $\text{cov}(Z_{g,i}, Z_{g,j}) =$   
 116 0.

117 We note that this covariance term can in principle be modified to account for shared  
 118 evolutionary history in experimental evolutionary studies where multiple taxa with a  
 119 resolved phylogeny have evolved in the same environment. More importantly, be-  
 120 cause our populations are independent, under a SSWM limit the presence of between-  
 121 population covariance values greater than expected by chance indicates the presence  
 122 of epistatic interactions. Therefore, the concept of absolute parallelism between popu-  
 123 lations in experimental evolution relates to PCA as the absence of covariance between  
 124 genes, a null expectation that can be statistically tested.

## 125 2.2 Signals of non-parallelism

126 Random versions of  $\mathbf{Z}$  ( $\mathbf{Z}^*$ ) were obtained by randomizing the co-occurrence of mu-  
127 tations across genes. We chose to generate  $\mathbf{Z}^*$  such that row and column sums are  
128 conserved, an approach that reduces covariance between genes while conserving the  
129 observed distribution of evolutionary distances and the distribution of per-gene mu-  
130 tation counts, respectively. This was done by adapting previously developed Python  
131 code [37] and the ASA159 FORTRAN77 library [38].

132 Deviations from parallelism were quantified using statistics frequently used in ran-  
133 dom matrix theory and multivariate statistical testing. The first two statistics are  
134 commonly used for analyses in ordination space, specifically the principal components  
135 (PCs) for the purpose of this study. The first statistic is the Mean Centroid Distance  
136 (MCD), a common measure of dispersion defined as

$$\text{MCD} = \frac{1}{n} \left( \sum_{i=1}^n \sum_{j=1}^k |P_{i,j} - \bar{p}_j|^2 \right)^{\frac{1}{2}} \quad (5)$$

137 where  $\mathbf{P}^{(k)}$  is the  $n \times k$  matrix consisting of the first  $k$  principal axes and  $\bar{p}_j$  is the  
138 mean of the  $j$ th axis [30].

139 The second statistic is the Mean Pairwise Distance (MPD), a statistic frequently  
140 used when comparing variation within and between groups in ordination space [2].

141 MPD is defined as

$$\text{MPD} = \frac{2}{n(n-1)} \sum_{i=2}^n \sum_{i=1}^{i-1} d(\mathbf{p}_i^{(k)}, \mathbf{p}_j^{(k)}) \quad (6)$$

142 where  $\mathbf{p}_i^{(k)}$  is the  $k$ -element vector of the  $i$ th population and  $d()$  is the Euclidean  
143 distance

144 The final statistic is the largest normalized eigenvalue [51, 39], defined as

$$\tilde{L}_1 = \frac{L_1 - \mu(n, g)}{\sigma(n, g)} \quad (7)$$

145 where  $L_1$  is normalized as  $L_1 = n\lambda_1 / \sum_{i=1}^n \lambda_i$  to sum to  $n$  and

$$\mu(n, g) = \frac{(\sqrt{g-1} + \sqrt{n})^2}{g} \quad (8)$$

$$\sigma(n, g) = \frac{\sqrt{g-1} + \sqrt{n}}{g} \left( \frac{1}{\sqrt{g-1}} + \frac{1}{\sqrt{n}} \right)^{\frac{1}{3}} \quad (9)$$

146 As  $n, g \rightarrow \infty$  and  $n/g \rightarrow \gamma \geq 1$   $\tilde{L}_1$  tends towards a Tracy-Widom distribution  
147 [29, 39]. Though these criteria can be relaxed [51] and  $\tilde{L}_1$  holds for matrices as small  
148 as  $5 \times 20$ . This approach was initially developed for Wishart matrices with Gaus-  
149 sian distributed entries. While mutation counts in  $\mathbf{X}$  are likely non-Gaussian, this is  
150 not critical and our data are unlikely to violate previously established criteria [46].  
151 While this statistic is less frequently used in multivariate ecological and evolutionary  
152 analyses, we chose to include it due to the fact that the distribution of primary eigen-  
153 values has analytic forms for certain classes of square matrices and is an active area  
154 of mathematical research [48], providing added interpretability to the statistic.

### 155 **2.3 Quantifying parallelism in simulated data**

156 While little is known about the distribution of gene-specific substitution rates, we  
157 are primarily interested in the covariance between genes that ultimately generates  
158 covariance between populations, so that the choice of a distribution that reflects  
159 the mean rate of evolution is not necessarily pertinent to examine the covariance.  
160 Therefore, we chose to generate the vector  $\mathbf{g}$  containing  $G$  gene-specific substitu-  
161 tion rates using a gamma distribution with a shape parameter of 3 and a scale pa-  
162 rameter of 1. To generate the between-gene covariance matrix we first generated  
163 scale-free random graphs using the Barabási-Albert preferential attachment model  
164 [1]. The `barabasi_albert_graph` and the `powerlaw_cluster_graph` functions from the  
165 `networkx` Python package [36] were used to generate Barabási-Albert graphs and clus-  
166 tered Barabási-Albert graphs [26], respectively. The adjacency matrix of the graph  
167 was multiplied by a given covariance value and the diagonal elements were set to  
168 one so that the matrix fit the standard normal form ( $\mathcal{N}(\mathbf{0}, \Sigma)$ ). We only proceeded

169 with the simulation if  $\Sigma$  was positive definite, the probability of which decreases with  
170 increasing values of  $\sigma$  under the Geršgorin circle theorem [43]. Poisson distributed  
171 mutation counts were generated using inverse transform sampling [14] with the cutoff  
172 determined by samples of the Cumulative Density Function of  $\mathcal{N}(\mathbf{0}, \Sigma)$  rather than the  
173 standard approach of sampling from a uniform distribution  $\mathcal{U}(\mathbf{0}, \mathbf{1})$  so that between  
174 gene covariance could be conserved (extended description in Supporting Information).  
175 PCA was performed using the `decomposition.PCA()` function from `scikit-learn` [40]  
176 in Python 3.6. Values from simulated  $\mathbf{Z}$  matrices were compared to a null distribution  
177 of values calculated from 1,000 iterations of  $\mathbf{Z}^*$ . This process was repeated 1,000 times  
178 to estimate statistical power as the proportion of simulations where the null could be  
179 rejected at a significance level of  $\alpha = 0.05$ .

## 180 2.4 Quantifying parallelism in empirical data

181 To determine the degree that deviations from parallelism can be detected we used a  
182 publicly available data set from one of the largest microbial evolution experiments. In  
183 this experiment, 115 replicate populations of *Escherichia coli* were serially transferred  
184 for 2,000 generations at 42.2 °C [50]. A single colony was isolated from each replicate  
185 population and sequenced. We merged all mutations from all replicate populations  
186 into a single population-by-gene count matrix. To account for gene size as a covariate,  
187 we corrected the number of mutations in all empirical data by calculating the excess  
188 number of mutations (i.e., *multiplicity*)  $m_{g,i} = Z_{g,i} \cdot \frac{\bar{L}}{L_g}$ , where  $\bar{L}$  is the mean size of  
189 all genes in the genome [23]. To measure the degree that reducing covariance affected  
190 clustering we calculated the variance ratio criteria using the Calinski and Harabaz score  
191 [11] on k-means clustered PC space [25] using `scikit-learn` [40]. Cluster stability was  
192 assessed by re-sampling populations in PC space with replacement, performing spectral  
193 clustering [25], and mapping clusters between the original and re-sampled PC space  
194 by their maximum Jaccard coefficient [33]. This process was repeated 10,000 times.

195 We compared our PCA-based results using data from [50] to analyses that do not  
196 account for covariance between genes. To do this, we summed across the rows of  
197 the population-by-gene matrix to generate a vector of the total number of mutations



198 acquired in each gene ( $n_i$ ) and calculated multiplicity of each of the  $i$  genes as  $m_i =$   
199  $n_i \cdot \frac{\bar{L}}{L_i}$ . Values of  $m_i$  were compared to the null expectation of  $\bar{m} = n_{tot}/N_{genes}$ , where  
200  $N_{genes}$  is the total number of genes in the genome, as the net increase in log-likelihood

$$\Delta\ell = \sum_i n_i \log\left(\frac{m_i}{\bar{m}}\right) \quad (10)$$

201 Where probability values that a given gene has an excess number of mutations  
202 with a False Discovery Rate (FDR) of 0.05 were calculated for each gene as previously  
203 described [23]. We calculated the  $\Delta\ell$ , the number of significant genes, and the propor-  
204 tion of times that genes of interest had a significant multiplicity by sampling a given  
205 number of populations without replacement 10,000 times.

206 To examine the degree that covariance between replicates affects the ability to  
207 distinguish between populations evolving under different conditions, we examined two  
208 datasets from studies with moderate within-treatment replication. The first dataset  
209 examined the spectrum of mutations in genomically recoded *E. coli* MG1655, where  
210 14 replicate populations of the following strains were serially transferred: (1) the non-  
211 recoded ancestor (ECNR2), (2) a strain where UAG stop codons were replaced with  
212 UAA and the class I peptide release factor 1 was deleted (C321. $\Delta$ A), (3) a C321. $\Delta$ A  
213 derivative with engineered reversions to three off-target mutations (C321. $\Delta$ A-v2), and  
214 (4) a C321. $\Delta$ A derivative recoded to restore RF1 (C321) [53]. The second study was  
215 more focused on the consequence of microbial life cycles in different environments.  
216 In this experiment *Burkholderia cenocepacia* with planktonic or biofilm life in en-  
217 vironments containing with low or high concentrations of carbon [52]. The degree  
218 of evolutionary divergence was quantified using two forms of Permutational ANOVA  
219 (PERMANOVA) F statistics, a standard one ( $F_1$ ) and one that accounts for unequal  
220 levels of parallelism among treatments ( $F_2$ ) [2]. Null population-by-gene count matri-  
221 ces for each study were constructed for  $k$  treatments, randomized, and concatenated  
222 as  $\mathbf{Z}^* = (\mathbf{Z}_1^*, \dots, \mathbf{Z}_k^*)^T$ . All entries were relativized by dividing each element by the  
223 sum of its row.

224 To examine temporal trends in covariance between populations we used publicly  
225 available sequence data from the Long-term Evolution Experiment [31], an experiment

226 consisting of twelve *E. coli* populations that have been serially propagated for over  
227 60,000 generations. We generated a population-by-gene count matrix every 500 gen-  
228 erations for fixed mutations inferred in [23] and concatenated observations as a single  
229 matrix. We chose to only examine the six nonmutator populations: Ara+1, +2, +4,  
230 +5, -5 and -6, as hypermutator populations exhibit qualitatively different molecular  
231 dynamics [23] that could affect the covariance between populations. While there are a  
232 variety of geometric techniques to examine temporal patterns in ordination space [10],  
233 we elected the straightforward approach of randomizing timepoints for each replicate  
234 population so that null values of MPD could be estimate in the absence of tempo-  
235 ral autocorrelation. The same multiplicity calculation was performed as described  
236 above. While there are a number of techniques to estimate the number of PCs to keep  
237 [42, 9, 19, 35], we elected to keep a number of PCs equal to the number of replicate  
238 populations for the LTEE data.

## 239 3 Results

### 240 3.1 Gene-level covariance is low

241 We find that statistical power for rejecting the null hypothesis of zero covariance  
242 between genes ( $H_0 : \Sigma = \mathbf{I}$ ) increases with covariance, but is generally low with  
243 the probability only reaching 0.25 with the highest covariance examined (Fig. 1).  
244 The statistics MCD and MPD calculated on the first principal component have much  
245 lower power than the more commonly used statistic  $\tilde{L}_1$ , though they overtake  $\tilde{L}_1$  once  
246 additional PCs are considered. Given that the statistics were fairly similar and that  
247 MPD is used to calculate  $F_2$  [2], we used MPD for the remaining analyses. Statistical  
248 power slightly increases with the degree of clustering, though the increment is very  
249 small for the range of clustering coefficients examined (Fig. 1) which indicates that  
250 the structure of the between-gene covariance matrix does not influence our ability to  
251 detect covariance between populations. Similar patterns were observed for the effect  
252 size (standardized score; Fig. 1). Though the ability to reject the null hypothesis  
253 requires a large number of replicate populations as well as a large number of genes

254 that acquire mutations (Fig. S1)

255 We find clear evidence of population covariance in existing data [50]. The *E. coli*  
256 populations appear to form three clusters in PC space (Fig. 2), where the formation  
257 of the two smaller clusters are primarily driven by mutations acquired in ESCRE1901  
258 and ECB\_01992 along the first and second principle components, respectively. Both  
259 genes are putative proteins with no known function that have acquired mutations in  
260 separate evolution experiments examining *E. coli* adaptation to heat [28]. Of all genes,  
261 ESCRE1901 has the highest squared correlation with the first principal component  
262 (i.e., rescaled loading;  $\rho^2 = 0.92$ ), the same being true for ECB\_01992 and the second  
263 PC ( $\rho^2 = 0.73$ ).

264 We find that the observed MPD<sup>(3)</sup> is significantly greater than the null expectation  
265 in the absence of covariance (Fig. 2, S2), though, consistent with our simulations  
266 (Fig. S1), the required replication to consistently reject the null is over an order of  
267 magnitude larger than the replication level of most standard evolution experiments  
268 (Fig. 2). This pattern holds at the gene level, as similar replication is needed to  
269 determine if ESCRE1901 and ECB\_01992 acquire more mutations than expected by  
270 chance across all replicate populations (3). That cluster formation is driven by a few  
271 genes explains the low stability of the clusters (Fig. 2), despite the fact that the  
272 variance ratio between and within clusters is much higher than what is found in null  
273 count matrices (Fig. 2). That few genes (and, therefore, few mutations) drive this  
274 covariance explains the lack of a clear relationship between either of the first two PCs  
275 or clusters in PC space and the relative fitness of each clone (Fig. S3).

### 276 **3.2 Within-group covariance does not interfere with the** 277 **ability to detect divergence.**

278 We find no significant difference between observed MPD values and the null expecta-  
279 tion when covariance is removed from the population-by-gene matrix of each treatment  
280 in two evolution experiments with multiple treatments and moderate replication (Fig.  
281 4, S4). This pattern holds at the level of summary statistics, as there is no significant

282 difference between estimates of between vs. within treatment variation and the null  
283 expectation in the absence of covariance for either  $F$  statistic (Fig. 4, Fig. S5).

### 284 **3.3 Temporal patterns of parallelism are detectable at the** 285 **gene-level**

286 Our previous results suggest that it would be difficult to infer whether there was  
287 a significant amount of between-gene covariance at a given timepoint in evolution  
288 experiments with a standard number of replicate populations. Indeed, that is also the  
289 case for the LTEE (Fig. S6). Instead, we chose to examine how MPD varied over  
290 time. In contrast with our attempts to detect covariance at a single time point, there  
291 are clear temporal patterns of parallelism in the LTEE despite there only being six  
292 replicate populations. While it is trivial that the genetic distance between initially  
293 identical replicate populations grown from a single clone has to increase, we see that  
294 after a period of increasing distance the replicate populations begin to become more  
295 similar (Fig. 5). By measuring MPD over the first five axes ( $MPD^{(5)}$ , Fig. S7), we  
296 find that there is a clear pattern where  $MPD^{(5)}$  rapidly increases over the first few  
297 thousand generations and gradually decreases starting at 4,750 generations.

## 298 **4 Discussion**

299 Our results suggest that it is difficult to detect covariance between populations at  
300 the gene-level in evolve-and-resequence evolution experiments with a standard level of  
301 replication. A minimum of 60 replicate populations are required to reject the null hy-  
302 pothesis of zero covariance 50% of the time in [50]. This may in part be due to the fact  
303 that individual clones were sequenced in this experiment, whereas pooled sequencing  
304 would provide estimates of mutation frequencies which may contain additional in-  
305 formation about their fitness effects. However, the number of replicate populations  
306 required was similar to our results from simulated data, suggesting that covariance  
307 cannot be detected at the gene level in the vast majority of evolution experiments.

308 While covariance was weak, we were able to identify genes that disproportionately

309 contribute to the observed signal. Covariance between populations in [50] is primarily  
310 driven by ESCRE1901 and ECB\_01992, two genes of unknown function that have also  
311 acquired mutations in a similarly designed experiment [28]. Given that covariance  
312 can indicate the presence of an interaction, ESCRE1901 and ECB\_01992 are useful  
313 candidates for investigating between-gene epistatic interactions in *E. coli*. However,  
314 there is no relationship between fitness and gene-level mutational composition or the  
315 presence of mutations in these genes. This lack of a relationship may be the result of  
316 the mutations in these genes making a relatively small overall contribution to fitness  
317 that cannot be detected at a coarse scale, as suggested by the fact that 50 replicate  
318 populations are required to determine that ESCRE1901 and ECB\_01992 acquire more  
319 mutations than expected by chance 95% of the time.

320 Observed  $F$  statistics were not significantly different from the null expectation  
321 in absence of within-group covariance for the datasets examined [52, 53]. This re-  
322 sult suggests that while covariance between populations is difficult to detect in evo-  
323 lution experiments with moderate replication (e.g.,  $n=4-6$ ), this low signal provides  
324 the added advantage of not having to be concerned with how different environments  
325 or backgrounds affect covariance between genes (i.e., the Behrens–Fisher problem [16,  
326 54]). Rather, the difference in mean gene-level substitution rates between treatments is  
327 likely greater than the covariance. While the experiments we examined were conducted  
328 in disparate environments or with synthetic strains, we argue that these conclusions  
329 will hold for experiments that examine microbial evolution across a more continuous  
330 environmental or genetic gradient.

331 While covariance between populations does not interfere with the ability to detect  
332 divergent evolution, we find evidence that covariance between replicate populations  
333 changes over time. In the LTEE we find that MPD rapidly increases over the first  
334 4,750 generations, followed by a steady decrease over the remaining 55,000 generations.  
335 This pattern is consistent with the “two-epoch” mean-field model of adaptation that  
336 has been proposed for this system, where populations evolve under an initial burst  
337 of macroscopic epistasis followed by the steady accumulation of mutations under a  
338 constant distribution of fitness effects [22]. That is, qualitative shifts in underlying

339 evolutionary dynamics may be detectable by examining covariance at the gene-level  
340 over time. While this transition between regimes has been suggested to occur at the  
341 10,000 generation mark [22], the difference of a few thousand generations does not  
342 negate the presence of the qualitative trend and this result may be corroborated by  
343 examining how gene-level interactions give rise to evolutionary dynamics predicted by  
344 mean-field models.

345 As long-term experiments become increasingly used to examine evolutionary dy-  
346 namics and test hypotheses it is necessary to identify appropriate statistical approaches  
347 and establish their limitations. Our work suggests that ordination techniques have a  
348 number of potential applications for experimental evolution. PCA specifically has  
349 the added advantage of being a well understood statistical tool for examining co-  
350 variance, which can be connected to the joint probability distribution of gene-level  
351 substitution rates. The structure of the covariance between genes is ultimately of the-  
352 oretical interest and while our results suggest that its statistical signal is small and  
353 the population-by-gene matrix is sparse, we are able to identify contributing genes  
354 with sufficient replication and identify temporal trends. For the more complex case of  
355 covariance over time, it will be necessary to examine this joint distribution in greater  
356 detail by incorporating it into models of evolutionary dynamics.

## 357 **5 Author Contributions**

358 WRS and JTL conceived the experiments and wrote the paper. WRS designed and  
359 performed the experiments and analysed the data.

## 360 **6 Acknowledgements**

361 We thank Benjamin H. Good and Michael M. Desai for their insightful comments at  
362 an early stage of this work. Financial support was provided by the National Science  
363 Foundation (1442246, JTL), US Army Research Office (W911NF-14-1-0411, JTL), and  
364 National Aeronautics and Space Administration (80NSSC20K0618, JTL). Computing

365 resources for simulations was supported by Lilly Endowment, Inc., through its sup-  
366 port for the Indiana University Pervasive Technology Institute, the National Science  
367 Foundation under Grant No. CNS-0521433, and Shared University Research grants  
368 from IBM, Inc., to Indiana University.

## 369 **7 Data Archiving**

370 No new empirical data was generated for this study. Reproducible code to perform the  
371 analyses in this study is available on GitHub as: <https://github.com/LennonLab/ParEvol>.  
372 Simulated data is available on Zenodo as DOI: [10.5281/zenodo.3779341](https://doi.org/10.5281/zenodo.3779341).

## 373 References

- 374 [1] Réka Albert and Albert-László Barabási. “Statistical mechanics of com-  
375 plex networks”. In: *Rev. Mod. Phys.* 74 (1 Jan. 2002), pp. 47–97. DOI:  
376 [10.1103/RevModPhys.74.47](https://link.aps.org/doi/10.1103/RevModPhys.74.47). URL: [https://link.aps.org/doi/10.](https://link.aps.org/doi/10.1103/RevModPhys.74.47)  
377 [1103/RevModPhys.74.47](https://link.aps.org/doi/10.1103/RevModPhys.74.47).
- 378 [2] Marti J. Anderson et al. “Some solutions to the multivariate Behrens–Fisher  
379 problem for dissimilarity-based analyses”. en. In: *Australian & New Zealand*  
380 *Journal of Statistics* 59.1 (2017), pp. 57–79. ISSN: 1467-842X. DOI: [10.](https://onlinelibrary.wiley.com/doi/abs/10.1111/anzs.12176)  
381 [1111/anzs.12176](https://onlinelibrary.wiley.com/doi/abs/10.1111/anzs.12176). URL: [https://onlinelibrary.wiley.com/doi/abs/](https://onlinelibrary.wiley.com/doi/abs/10.1111/anzs.12176)  
382 [10.1111/anzs.12176](https://onlinelibrary.wiley.com/doi/abs/10.1111/anzs.12176) (visited on 01/15/2020).
- 383 [3] Susan F. Bailey, Qianyun Guo, and Thomas Bataillon. “Identifying Drivers  
384 of Parallel Evolution: A Regression Model Approach”. en. In: *Genome Bi-*  
385 *ology and Evolution* 10.10 (Oct. 2018), pp. 2801–2812. DOI: [10.1093/gbe/](https://academic.oup.com/gbe/article/10/10/2801/5106663)  
386 [evy210](https://academic.oup.com/gbe/article/10/10/2801/5106663). URL: [https://academic.oup.com/gbe/article/10/10/2801/](https://academic.oup.com/gbe/article/10/10/2801/5106663)  
387 [5106663](https://academic.oup.com/gbe/article/10/10/2801/5106663) (visited on 01/21/2020).
- 388 [4] Susan F. Bailey et al. “What drives parallel evolution?” en. In: *BioEssays*  
389 39.1 (2017), e201600176. ISSN: 1521-1878. DOI: [10.1002/bies.201600176](https://onlinelibrary.wiley.com/doi/abs/10.1002/bies.201600176).  
390 URL: [https://onlinelibrary.wiley.com/doi/abs/10.1002/bies.](https://onlinelibrary.wiley.com/doi/abs/10.1002/bies.201600176)  
391 [201600176](https://onlinelibrary.wiley.com/doi/abs/10.1002/bies.201600176) (visited on 01/21/2020).
- 392 [5] Benedikt Bauer and Chaitanya S. Gokhale. “Repeatability of evolution on  
393 epistatic landscapes”. en. In: *Scientific Reports* 5.1 (May 2015), pp. 1–6.  
394 ISSN: 2045-2322. DOI: [10.1038/srep09607](https://www.nature.com/articles/srep09607). URL: [https://www.nature.](https://www.nature.com/articles/srep09607)  
395 [com/articles/srep09607](https://www.nature.com/articles/srep09607) (visited on 01/21/2020).
- 396 [6] Megan G. Behringer et al. “Escherichia coli cultures maintain stable sub-  
397 population structure during long-term evolution”. en. In: *Proceedings of*  
398 *the National Academy of Sciences* 115.20 (May 2018), E4642–E4650. ISSN:



- 399 0027-8424, 1091-6490. DOI: [10.1073/pnas.1708371115](https://doi.org/10.1073/pnas.1708371115). URL: <https://www.pnas.org/content/115/20/E4642> (visited on 01/20/2020).
- 400
- 401 [7] Frederic Bertels et al. “Parallel Evolution of HIV-1 in a Long-Term Exper-
- 402 iment”. In: *Molecular Biology and Evolution* 36.11 (2019), pp. 2400–2414.
- 403 ISSN: 0737-4038. DOI: [10.1093/molbev/msz155](https://doi.org/10.1093/molbev/msz155). URL: [https://doi.org/](https://doi.org/10.1093/molbev/msz155)
- 404 [10.1093/molbev/msz155](https://doi.org/10.1093/molbev/msz155).
- 405 [8] Daniel I. Bolnick et al. “(Non)Parallel Evolution”. In: *Annual Review of*
- 406 *Ecology, Evolution, and Systematics* 49.1 (2018), pp. 303–330. DOI: [10.](https://doi.org/10.1146/annurev-ecolsys-110617-062240)
- 407 [1146/annurev-ecolsys-110617-062240](https://doi.org/10.1146/annurev-ecolsys-110617-062240). URL: [https://doi.org/10.](https://doi.org/10.1146/annurev-ecolsys-110617-062240)
- 408 [1146/annurev-ecolsys-110617-062240](https://doi.org/10.1146/annurev-ecolsys-110617-062240) (visited on 01/20/2020).
- 409 [9] R. Bro et al. “Cross-validation of component models: a critical look at
- 410 current methods”. eng. In: *Analytical and Bioanalytical Chemistry* 390.5
- 411 (Mar. 2008), pp. 1241–1251. ISSN: 1618-2650. DOI: [10.1007/s00216-007-](https://doi.org/10.1007/s00216-007-1790-1)
- 412 [1790-1](https://doi.org/10.1007/s00216-007-1790-1).
- 413 [10] Miquel De Cáceres et al. “Trajectory analysis in community ecology”. en.
- 414 In: *Ecological Monographs* 89.2 (2019), e01350. ISSN: 1557-7015. DOI: [10.](https://doi.org/10.1002/ecm.1350)
- 415 [1002/ecm.1350](https://doi.org/10.1002/ecm.1350). URL: [https://esajournals.onlinelibrary.wiley.](https://esajournals.onlinelibrary.wiley.com/doi/abs/10.1002/ecm.1350)
- 416 [com/doi/abs/10.1002/ecm.1350](https://esajournals.onlinelibrary.wiley.com/doi/abs/10.1002/ecm.1350) (visited on 01/20/2020).
- 417 [11] T. Calinski and J. Harabasz. “A dendrite method for cluster analysis”. In:
- 418 *Communications in Statistics* 3.1 (Jan. 1974), pp. 1–27. ISSN: 0090-3272.
- 419 DOI: [10.1080/03610927408827101](https://doi.org/10.1080/03610927408827101). URL: [https://www.tandfonline.](https://www.tandfonline.com/doi/abs/10.1080/03610927408827101)
- 420 [com/doi/abs/10.1080/03610927408827101](https://www.tandfonline.com/doi/abs/10.1080/03610927408827101) (visited on 01/25/2020).
- 421 [12] Pamela F. Colosimo et al. “Widespread Parallel Evolution in Sticklebacks
- 422 by Repeated Fixation of Ectodysplasin Alleles”. In: *Science* 307.5717
- 423 (2005), pp. 1928–1933. ISSN: 0036-8075. DOI: [10.1126/science.1107239](https://doi.org/10.1126/science.1107239).
- 424 eprint: <https://science.sciencemag.org/content/307/5717/1928>.

- 425 [full.pdf](#). URL: <https://science.sciencemag.org/content/307/>  
426 [5717/1928](#).
- 427 [13] Vaughn S. Cooper. “Experimental Evolution as a High-Throughput Screen  
428 for Genetic Adaptations”. In: *mSphere* 3.3 (2018). Ed. by Ana Cristina  
429 Gales. DOI: [10.1128/mSphere.00121-18](https://doi.org/10.1128/mSphere.00121-18). URL: [https://msphere.asm.](https://msphere.asm.org/content/3/3/e00121-18)  
430 [org/content/3/3/e00121-18](#).
- 431 [14] Luc Devroye. “Discrete Univariate Distributions”. en. In: *Non-Uniform*  
432 *Random Variate Generation*. New York, NY: Springer New York, 1986,  
433 pp. 485–553. ISBN: 978-1-4613-8645-2. DOI: [10.1007/978-1-4613-8643-](https://doi.org/10.1007/978-1-4613-8643-8_10)  
434 [8\\_10](#). URL: [http://link.springer.com/10.1007/978-1-4613-8643-](http://link.springer.com/10.1007/978-1-4613-8643-8_10)  
435 [8\\_10](#) (visited on 01/12/2020).
- 436 [15] Kaitlin J. Fisher, Sergey Kryazhimskiy, and Gregory I. Lang. “Detecting  
437 genetic interactions using parallel evolution in experimental populations”.  
438 In: *Philosophical Transactions of the Royal Society B: Biological Sciences*  
439 374.1777 (July 2019), p. 20180237. DOI: [10.1098/rstb.2018.0237](https://doi.org/10.1098/rstb.2018.0237). URL:  
440 [https://royalsocietypublishing.org/doi/full/10.1098/rstb.](https://royalsocietypublishing.org/doi/full/10.1098/rstb.2018.0237)  
441 [2018.0237](#) (visited on 01/26/2020).
- 442 [16] R. A. Fisher. “The Fiducial Argument in Statistical Inference”. en. In:  
443 *Annals of Eugenics* 6.4 (1935), pp. 391–398. ISSN: 2050-1439. DOI: [10.](https://doi.org/10.1111/j.1469-1809.1935.tb02120.x)  
444 [1111/j.1469-1809.1935.tb02120.x](#). URL: [https://onlinelibrary.](https://onlinelibrary.wiley.com/doi/abs/10.1111/j.1469-1809.1935.tb02120.x)  
445 [wiley.com/doi/abs/10.1111/j.1469-1809.1935.tb02120.x](#) (visited  
446 on 01/28/2020).
- 447 [17] David T Fraebel et al. “Environment determines evolutionary trajectory in  
448 a constrained phenotypic space”. In: *eLife* 6 (Mar. 2017). Ed. by Wenying  
449 Shou, e24669. ISSN: 2050-084X. DOI: [10.7554/eLife.24669](https://doi.org/10.7554/eLife.24669). URL: [https:](https://doi.org/10.7554/eLife.24669)  
450 [//doi.org/10.7554/eLife.24669](#) (visited on 01/20/2020).

- 451 [18] Jens Frickel et al. “Population size changes and selection drive patterns of  
452 parallel evolution in a host-virus system”. en. In: *Nature Communications*  
453 9.1 (Apr. 2018), pp. 1–10. ISSN: 2041-1723. DOI: [10.1038/s41467-018-](https://doi.org/10.1038/s41467-018-03990-7)  
454 [03990-7](https://doi.org/10.1038/s41467-018-03990-7). URL: [https://www.nature.com/articles/s41467-018-](https://www.nature.com/articles/s41467-018-03990-7)  
455 [03990-7](https://www.nature.com/articles/s41467-018-03990-7) (visited on 02/09/2020).
- 456 [19] Matan Gavish and David L. Donoho. “The Optimal Hard Threshold for  
457 Singular Values is  $\sqrt{3}$ ”. In: *IEEE Transactions on Information*  
458 *Theory* 60.8 (Aug. 2014), pp. 5040–5053. ISSN: 1557-9654. DOI: [10.1109/](https://doi.org/10.1109/TIT.2014.2323359)  
459 [TIT.2014.2323359](https://doi.org/10.1109/TIT.2014.2323359).
- 460 [20] John H. Gillespie. *Population Genetics: A Concise Guide*. English. 2nd  
461 edition. Baltimore, Md: JHUP, Aug. 2004. ISBN: 978-0-8018-8009-4.
- 462 [21] Shmuel Gleizer et al. “Conversion of Escherichia coli to Generate All  
463 Biomass Carbon from CO<sub>2</sub>”. en. In: *Cell* 179.6 (Nov. 2019), 1255–1263.e12.  
464 ISSN: 0092-8674. DOI: [10.1016/j.cell.2019.11.009](https://doi.org/10.1016/j.cell.2019.11.009). URL: [http://www.](http://www.sciencedirect.com/science/article/pii/S0092867419312309)  
465 [sciencedirect.com/science/article/pii/S0092867419312309](http://www.sciencedirect.com/science/article/pii/S0092867419312309) (vis-  
466 ited on 01/20/2020).
- 467 [22] Benjamin H. Good and Michael M. Desai. “The Impact of Macroscopic  
468 Epistasis on Long-Term Evolutionary Dynamics”. en. In: *Genetics* 199.1  
469 (Jan. 2015), pp. 177–190. ISSN: 0016-6731, 1943-2631. DOI: [10.1534/](https://doi.org/10.1534/genetics.114.172460)  
470 [genetics.114.172460](https://doi.org/10.1534/genetics.114.172460). URL: [https://www.genetics.org/content/](https://www.genetics.org/content/199/1/177)  
471 [199/1/177](https://www.genetics.org/content/199/1/177) (visited on 01/26/2020).
- 472 [23] Benjamin H. Good et al. “The dynamics of molecular evolution over 60,000  
473 generations”. en. In: *Nature* 551.7678 (Nov. 2017), pp. 45–50. ISSN: 1476-  
474 4687. DOI: [10.1038/nature24287](https://doi.org/10.1038/nature24287). URL: [https://www.nature.com/](https://www.nature.com/articles/nature24287)  
475 [articles/nature24287](https://www.nature.com/articles/nature24287) (visited on 01/21/2020).

- 476 [24] Paul H. Harvey and Mark D. Pagel. *The comparative method in evolution-*  
477 *ary biology*. Oxford series in ecology and evolution. Oxford ; New York:  
478 Oxford University Press, 1991. ISBN: 0198546408.
- 479 [25] Trevor Hastie, Robert Tibshirani, and Jerome Friedman. *The Elements*  
480 *of Statistical Learning: Data Mining, Inference, and Prediction, Second*  
481 *Edition*. en. 2nd ed. Springer Series in Statistics. New York: Springer-  
482 Verlag, 2009. ISBN: 978-0-387-84857-0. DOI: [10.1007/978-0-387-84858-](https://doi.org/10.1007/978-0-387-84858-7)  
483 [7](https://doi.org/10.1007/978-0-387-84858-7). URL: <https://www.springer.com/gp/book/9780387848570> (visited  
484 on 01/25/2020).
- 485 [26] Petter Holme and Beom Jun Kim. “Growing scale-free networks with  
486 tunable clustering”. In: *Phys. Rev. E* 65 (2 Jan. 2002), p. 026107. DOI:  
487 [10.1103/PhysRevE.65.026107](https://doi.org/10.1103/PhysRevE.65.026107). URL: [https://link.aps.org/doi/10.](https://link.aps.org/doi/10.1103/PhysRevE.65.026107)  
488 [1103/PhysRevE.65.026107](https://link.aps.org/doi/10.1103/PhysRevE.65.026107).
- 489 [27] Rebekah L. Horn et al. “Parallel evolution of site specific changes in di-  
490 vergent caribou lineages”. In: *Ecology and Evolution* 8.12 (May 2018),  
491 pp. 6053–6064. ISSN: 2045-7758. DOI: [10.1002/ece3.4154](https://doi.org/10.1002/ece3.4154). URL: [https:](https://www.ncbi.nlm.nih.gov/pmc/articles/PMC6024114/)  
492 [//www.ncbi.nlm.nih.gov/pmc/articles/PMC6024114/](https://www.ncbi.nlm.nih.gov/pmc/articles/PMC6024114/) (visited on  
493 01/20/2020).
- 494 [28] Shaun M. Hug and Brandon S. Gaut. “The phenotypic signature of adap-  
495 tation to thermal stress in *Escherichia coli*”. In: *BMC Evolutionary Biology*  
496 15.1 (Sept. 2015), p. 177. ISSN: 1471-2148. DOI: [10.1186/s12862-015-](https://doi.org/10.1186/s12862-015-0457-3)  
497 [0457-3](https://doi.org/10.1186/s12862-015-0457-3). URL: <https://doi.org/10.1186/s12862-015-0457-3> (visited  
498 on 01/26/2020).
- 499 [29] Iain M. Johnstone. “On the distribution of the largest eigenvalue in princi-  
500 pal components analysis”. In: *Ann. Statist.* 29.2 (Apr. 2001), pp. 295–327.  
501 DOI: [10.1214/aos/1009210544](https://doi.org/10.1214/aos/1009210544). URL: [https://doi.org/10.1214/aos/](https://doi.org/10.1214/aos/1009210544)  
502 [1009210544](https://doi.org/10.1214/aos/1009210544).

- 503 [30] Pierre Legendre and Loic FJ Legendre. *Numerical ecology*. Vol. 24. Else-  
504 vier, 2012.
- 505 [31] Richard E. Lenski et al. “Long-Term Experimental Evolution in *Escherichia*  
506 coli. I. Adaptation and Divergence During 2,000 Generations”. In: *The*  
507 *American Naturalist* 138.6 (1991), pp. 1315–1341. ISSN: 00030147, 15375323.  
508 URL: <http://www.jstor.org/stable/2462549>.
- 509 [32] Stephen De Lisle and Daniel I. Bolnick. “A Multivariate View of Parallel  
510 Evolution”. en. In: *bioRxiv* (Jan. 2020), p. 2020.01.26.920439. DOI: [10.1101/2020.01.26.920439](https://doi.org/10.1101/2020.01.26.920439). URL: <https://www.biorxiv.org/content/10.1101/2020.01.26.920439v1> (visited on 01/27/2020).
- 513 [33] Ulrike von Luxburg. “Clustering Stability: An Overview”. English. In:  
514 *Foundations and Trends in Machine Learning* 2.3 (Apr. 2010), pp. 235–  
515 274. ISSN: 1935-8237, 1935-8245. DOI: [10.1561/22000000008](https://doi.org/10.1561/22000000008). URL: <https://www.nowpublishers.com/article/Details/MAL-008> (visited on  
516 01/25/2020).
- 518 [34] Gil McVean. “A Genealogical Interpretation of Principal Components  
519 Analysis”. en. In: *PLOS Genetics* 5.10 (Oct. 2009), e1000686. ISSN: 1553-  
520 7404. DOI: [10.1371/journal.pgen.1000686](https://doi.org/10.1371/journal.pgen.1000686). URL: <https://journals.plos.org/plosgenetics/article?id=10.1371/journal.pgen.1000686>  
521 (visited on 01/14/2020).
- 523 [35] Thomas P. Minka. “Automatic Choice of Dimensionality for PCA”. In:  
524 *Advances in Neural Information Processing Systems 13*. Ed. by T. K.  
525 Leen, T. G. Dietterich, and V. Tresp. MIT Press, 2001, pp. 598–604.  
526 URL: <http://papers.nips.cc/paper/1853-automatic-choice-of-dimensionality-for-pca.pdf> (visited on 01/26/2020).
- 528 [36] NetworkX developer team. *NetworkX*. 2014. URL: <https://networkx.github.io/>.  
529

- 530 [37] Emmanuel Noutahi. *Fisher's exact test for  $M \times N$  contingency tables*. 2018.  
531 DOI: [10.5281/zenodo.2587757](https://doi.org/10.5281/zenodo.2587757).
- 532 [38] W. M. Patefield. "Algorithm AS159. An efficient method of generating  $r \times$   
533  $c$  tables with given row and column totals". In: *Applied Statistics* (1981),  
534 pp. 91–97.
- 535 [39] Nick Patterson, Alkes L. Price, and David Reich. "Population Struc-  
536 ture and Eigenanalysis". en. In: *PLOS Genetics* 2.12 (Dec. 2006), e190.  
537 ISSN: 1553-7404. DOI: [10.1371/journal.pgen.0020190](https://doi.org/10.1371/journal.pgen.0020190). URL: <https://journals.plos.org/plosgenetics/article?id=10.1371/journal.pgen.0020190>  
538 (visited on 01/15/2020).
- 540 [40] F. Pedregosa et al. "Scikit-learn: Machine Learning in Python". In: *Jour-  
541 nal of Machine Learning Research* 12 (2011), pp. 2825–2830.
- 542 [41] Barbara Pickersgill. "Parallel vs. Convergent Evolution in Domestication  
543 and Diversification of Crops in the Americas". English. In: *Frontiers in  
544 Ecology and Evolution* 6 (2018). ISSN: 2296-701X. DOI: [10.3389/fevo.  
545 2018.00056](https://doi.org/10.3389/fevo.2018.00056). URL: [https://www.frontiersin.org/articles/10.3389/  
546 fevo.2018.00056/full](https://www.frontiersin.org/articles/10.3389/fevo.2018.00056/full) (visited on 01/20/2020).
- 547 [42] S. Joe Qin and Ricardo Dunia. "Determining the number of principal  
548 components for best reconstruction". en. In: *Journal of Process Control*  
549 10.2 (Apr. 2000), pp. 245–250. ISSN: 0959-1524. DOI: [10.1016/S0959-  
550 1524\(99\)00043-8](https://doi.org/10.1016/S0959-1524(99)00043-8). URL: [http://www.sciencedirect.com/science/  
551 article/pii/S0959152499000438](http://www.sciencedirect.com/science/article/pii/S0959152499000438) (visited on 01/26/2020).
- 552 [43] Steven Roman. *Advanced Linear Algebra*. Vol. 135. Graduate Texts in  
553 Mathematics. New York, NY: Springer New York, 2008. ISBN: 0387728287.  
554 DOI: [10.1007/978-0-387-72831-5](https://doi.org/10.1007/978-0-387-72831-5). URL: [http://link.springer.com/  
555 10.1007/978-0-387-72831-5](http://link.springer.com/10.1007/978-0-387-72831-5) (visited on 01/12/2020).

- 556 [44] Jonathon Shlens. “A Tutorial on Principal Component Analysis”. In:  
557 *arXiv:1404.1100 [cs, stat]* (Apr. 2014). arXiv: 1404.1100. URL: <http://arxiv.org/abs/1404.1100> (visited on 01/14/2020).
- 559 [45] Nick W. Smith et al. “The Classification and Evolution of Bacterial Cross-  
560 Feeding”. English. In: *Frontiers in Ecology and Evolution* 7 (2019). ISSN:  
561 2296-701X. DOI: [10.3389/fevo.2019.00153](https://doi.org/10.3389/fevo.2019.00153). URL: <https://www.frontiersin.org/articles/10.3389/fevo.2019.00153/full> (vis-  
562 ited on 01/20/2020).
- 564 [46] Alexander Soshnikov. “A Note on Universality of the Distribution of the  
565 Largest Eigenvalues in Certain Sample Covariance Matrices”. In: *Journal of Statistical Physics* 108.5 (2002), pp. 1033–1056. DOI: [10.1023/A:1019739414239](https://doi.org/10.1023/A:1019739414239). URL: <https://doi.org/10.1023/A:1019739414239>.
- 568 [47] Yoel E. Stuart et al. “Contrasting effects of environment and genetics  
569 generate a continuum of parallel evolution”. In: *Nature Ecology & Evolu-  
570 tion* 1.6 (2017), p. 0158. DOI: [10.1038/s41559-017-0158](https://doi.org/10.1038/s41559-017-0158). URL: <https://doi.org/10.1038/s41559-017-0158>.
- 572 [48] Terence Tao. *Topics in Random Matrix Theory*. English. Providence, R.I:  
573 American Mathematical Society, Mar. 2012. ISBN: 978-0-8218-7430-1.
- 574 [49] Olivier Tenaillon et al. “Tempo and mode of genome evolution in a 50,000-  
575 generation experiment”. In: *Nature* 536.7615 (Aug. 2016), pp. 165–170.  
576 ISSN: 0028-0836. DOI: [10.1038/nature18959](https://doi.org/10.1038/nature18959). URL: <https://www.ncbi.nlm.nih.gov/pmc/articles/PMC4988878/> (visited on 01/21/2020).
- 578 [50] Olivier Tenaillon et al. “The Molecular Diversity of Adaptive Conver-  
579 gence”. In: *Science* 335.6067 (2012), pp. 457–461. ISSN: 0036-8075. DOI:  
580 [10.1126/science.1212986](https://doi.org/10.1126/science.1212986). URL: <https://science.sciencemag.org/content/335/6067/457>.  
581

- 582 [51] Craig A. Tracy and Harold Widom. “Level-spacing distributions and the  
583 Airy kernel”. In: *Comm. Math. Phys.* 159.1 (1994), pp. 151–174. URL:  
584 <https://projecteuclid.org:443/euclid.cmp/1104254495>.
- 585 [52] Caroline B. Turner, Christopher W. Marshall, and Vaughn S. Cooper.  
586 “Parallel genetic adaptation across environments differing in mode of  
587 growth or resource availability”. In: *Evolution Letters* 2.4 (Aug. 2018),  
588 pp. 355–367. ISSN: 2056-3744. DOI: [10.1002/evl3.75](https://doi.org/10.1002/evl3.75). (Visited on 01/14/2020).
- 589 [53] Timothy M. Wannier et al. “Adaptive evolution of genomically recoded  
590 *Escherichia coli*”. eng. In: *Proceedings of the National Academy of Sciences  
591 of the United States of America* 115.12 (2018), pp. 3090–3095. ISSN: 1091-  
592 6490. DOI: [10.1073/pnas.1715530115](https://doi.org/10.1073/pnas.1715530115).
- 593 [54] B. L. Welch. “The Significance of the Difference Between Two Means when  
594 the Population Variances are Unequal”. In: *Biometrika* 29.3/4 (1938),  
595 pp. 350–362. ISSN: 0006-3444. DOI: [10.2307/2332010](https://doi.org/10.2307/2332010). URL: [https://  
596 www.jstor.org/stable/2332010](https://www.jstor.org/stable/2332010) (visited on 01/28/2020).
- 597 [55] Robert Woods et al. “Tests of parallel molecular evolution in a long-term  
598 experiment with *Escherichia coli*”. en. In: *Proceedings of the National  
599 Academy of Sciences* 103.24 (June 2006), pp. 9107–9112. ISSN: 0027-8424,  
600 1091-6490. DOI: [10.1073/pnas.0602917103](https://doi.org/10.1073/pnas.0602917103). URL: [https://www.pnas.  
601 org/content/103/24/9107](https://www.pnas.org/content/103/24/9107) (visited on 01/20/2020).
- 602 [56] Song Xu, Lucas BÄttcher, and Tom Chou. “Diversity in Biology: defini-  
603 tions, quantification and models”. eng. In: *Physical Biology* (Jan. 2020).  
604 ISSN: 1478-3975. DOI: [10.1088/1478-3975/ab6754](https://doi.org/10.1088/1478-3975/ab6754).



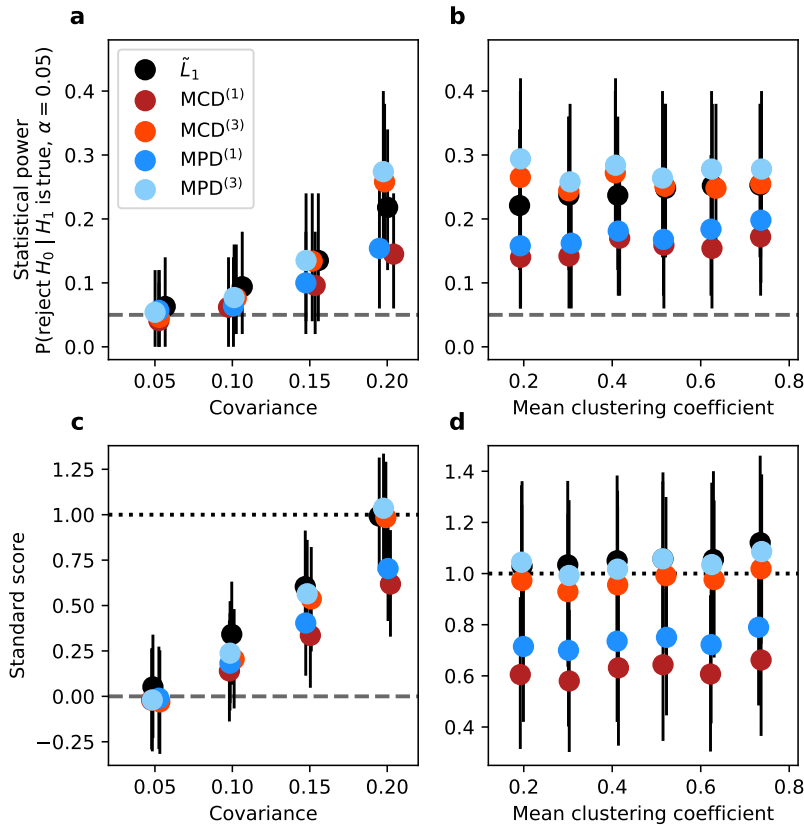

Figure 1: The relationship between properties of  $\Sigma$  and statistical power at a significance level of  $\alpha = 0.05$  (dashed horizontal grey line), the probability of rejecting the null hypothesis  $\Sigma = \mathbf{I}$ . **a)** Statistical power increases with covariance across all methods, though MCD and MPD only approach the level of  $\tilde{L}_1$  when they are estimated over the first three principal components. **b)** There is no clear relationship between statistical power and the degree of clustering in  $\Sigma$ . Similar results were found for the standard score of each method in **c)** and **d)**, where the grey and black lines represent values of zero and a single standard deviation, respectively. Power was calculated from 1,000 simulations using 100 replicate populations and 50 genes. Black gray bars represent 95% bootstrapped confidence intervals from 10,000 samples.

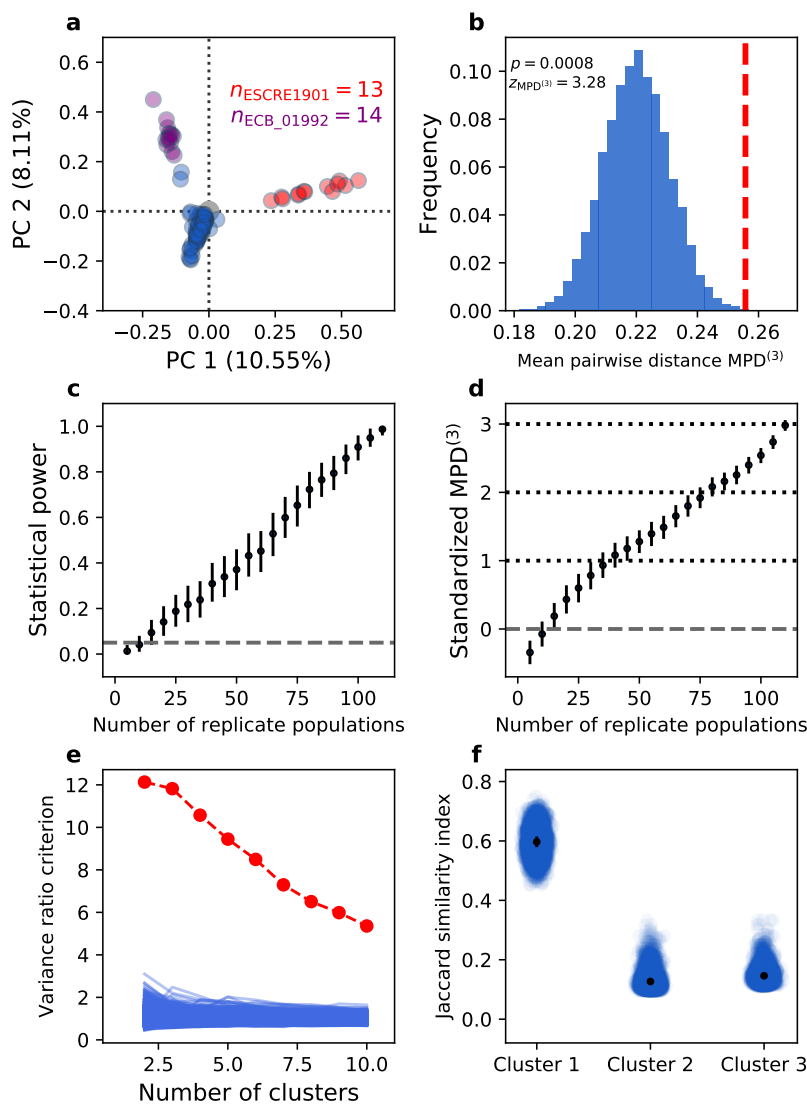

Figure 2: Properties of parallelism in the evolved *E. coli* replicate populations from [50]. **a)** There is clear structure in the data and **b)**  $\text{MPD}^{(3)}$  (dashed red vertical line) is larger than the null distribution calculated from randomized population-by-gene multiplicity matrices (blue histogram). **c), d)** Covariance is difficult to detect and requires a large number of replicate populations. **e)** While there is clearly greater variance between groups than within, **f)** there is low cluster stability for  $k = 3$ .

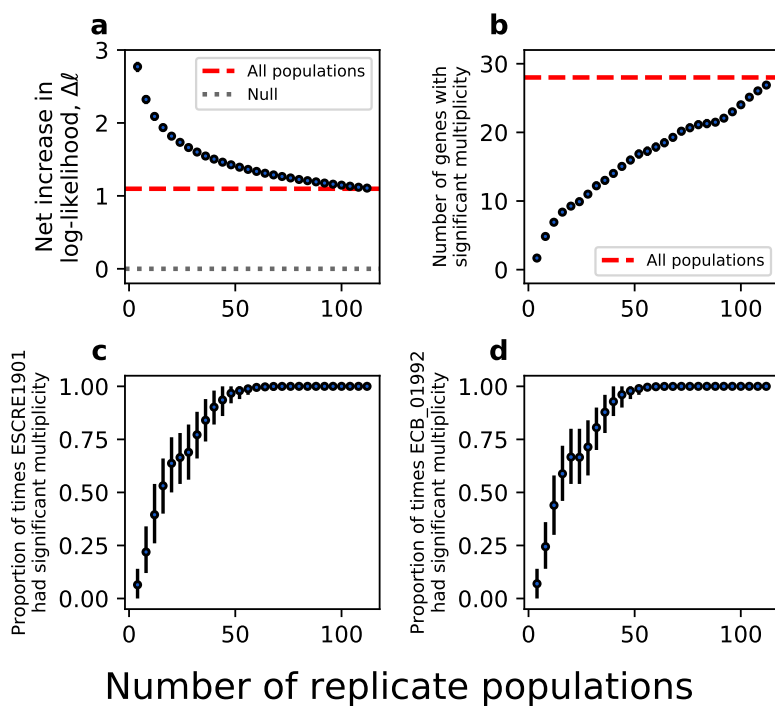

Figure 3: Sampling curve describing how parallelism changes as the number of replicate populations increases using data from [50]. Significant genes in **b**), **c**), and **d**) were determined using the multiplicity calculations presented in [23] with a FDR of 0.05. Each dot was calculated from 10,000 sampling events of a given size without replacement from the gene-by-population matrix. Black bars represent 95% bootstrapped confidence intervals calculated from 10,000 samples.

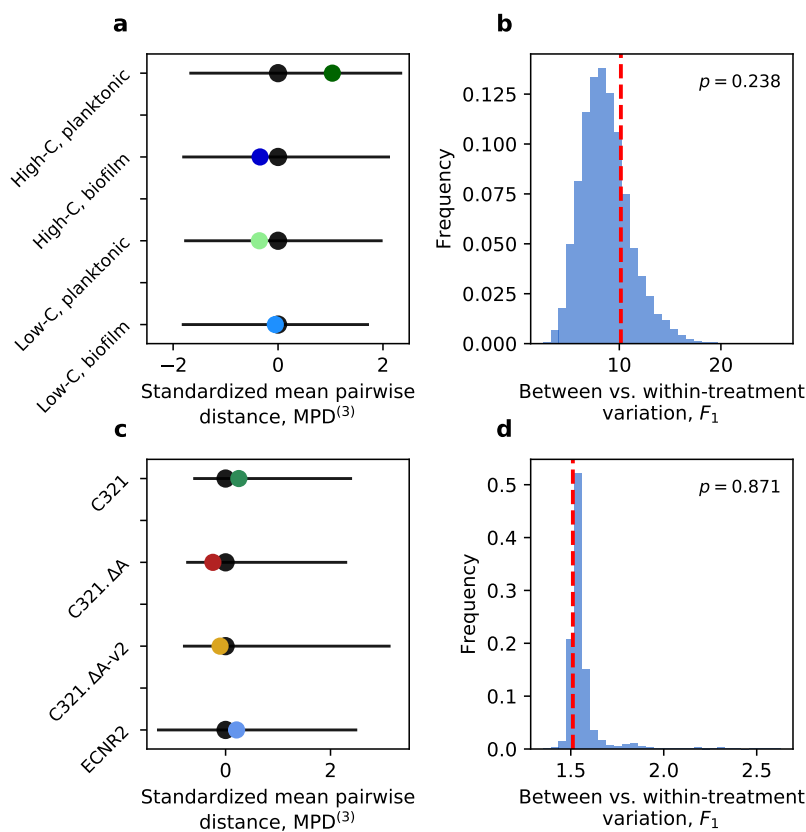

Figure 4: Between covariance is unlikely to affect the degree to detect divergent evolution.  $MPD^{(3)}$  of each treatment and  $F_1$  statistics across all treatments are not significantly different from the null expectation when covariance between individuals within the same treatment is removed for data from [52] in **a**, **b**) and data from [53] in **c**, **d**). The black dots and lines in **a**) and **c**) represent the mean and 95% standardized CIs from null simulations while the colored dots represent the observed standardized values of  $MPD^{(3)}$ . The red dashed vertical lines in **b**) and **d**) represents the observed value of  $F$  and the blue histogram represents simulated values of  $F_1$  in the absence of within group covariance.

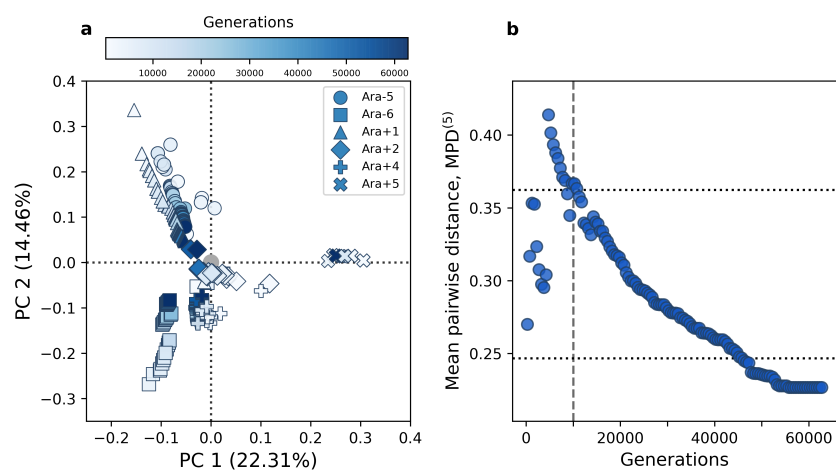

Figure 5: Temporal patterns of parallelism in the LTEE [23]. **a)** The PCA projection of the gene-by-sample multiplicity matrix. **b)** By calculating MPD<sup>(5)</sup> at each timepoint we can see temporal patterns in the similarity between populations. The dotted horizontal black lines represent the 95% intervals for MPD in the absence of temporal autocorrelation and the vertical dashed grey line represents the 10,000 generation mark.
